# Supplementary material
Source: PubMed Central journal article supplement (PMC8403892)
Supplement: mmc1.pdf [file mmc1.pdf]

## **Statistical methods used to weight seroprevalence**

We accounted for the complex design and sampling methods with weights (the reciprocal of probability of one individual being selected) for calculating point estimates and 95% CIs of seroprevalence.

The weight for an individual was calculated as follows;

### **Calculating basic weight (BW);**

Probability 1: probability of each cluster (village) being sampled

*Prob1 = (number of households per village x number of villages) / total of villages in the district*

Probability 2: probability of each household being sampled in each cluster (village)

*Prob2 = number of households to be sampled in each village / number of household per village*

Probability 3: probability of an individual to be sampled in each household

*Prob3= 1* (all individuals in the household are invited to participate)

Basic weight: overall basic weight of an individual being sampled in the population

*BW= 1/(Prob1XProb2) x Prob3*

### **Calculating post-stratification weights (PostW)**

$$PostW = \frac{N_{ij}}{\sum BW}$$

where  $N_{ij}$  is the population size of i age group j sex in the country; and  $\sum BW$  is the sum of basic weights of all study subjects in the country.

### **Calculating final weights for an individual (FinalW);**

*FinalW = BW x PostW*

**The point estimates of seroprevalence (p) was calculated as follows ;**

$$p = \frac{\sum_{i=1}^n w_i y_i}{\sum_{i=1}^n w_i}$$

where p is the weighted prevalence,  $W_i$  is the sampling weights for an study subjects, and  $y_i$  is the characteristics of study interests, for example if we are interested in the prevalence of SARS-CoV-2 infection in males, then the value of  $y_i$  for male subjects is assigned 1 and the others would be assigned 0.

Supplementary Table 1.

| Cohort       | Guano collectors |                    |                               |                     |                               |
|--------------|------------------|--------------------|-------------------------------|---------------------|-------------------------------|
|              | Sample tested, n | S-ELISA positive,n | Crude seroprevalence % ,95%CI | N-ELISA positive, n | Crude seroprevalence % ,95%CI |
| <b>Total</b> | <b>74</b>        | <b>5</b>           | <b>6.8 (2.8-15.3)</b>         | <b>15</b>           | <b>20.3 (12.6-31.0)</b>       |
| <b>Age</b>   |                  |                    |                               |                     |                               |
| ≤ 18 years   | 5                | 0                  |                               | 0                   |                               |
| 19-40 years  | 30               | 4                  | 13.3 (4.9-31.3)               | 3                   | 10.0 (3.1-27.6)               |
| 41-60 years  | 28               | 0                  |                               | 10                  | 35.7 (20.0-55.3)              |
| > 60 years   | 11               | 1                  | 9.1 (1.1-47.2)                | 2                   | 18.2 (4.1-5.3)                |
| <b>Sex</b>   |                  |                    |                               |                     |                               |
| Female       | 39               | 2                  | 5.1 (1.2-19.0)                | 6                   | 15.4 (6.9-30.8)               |
| Male         | 35               | 3                  | 8.6 (2.7-24.1)                | 9                   | 25.7 (13.7-43.1)              |

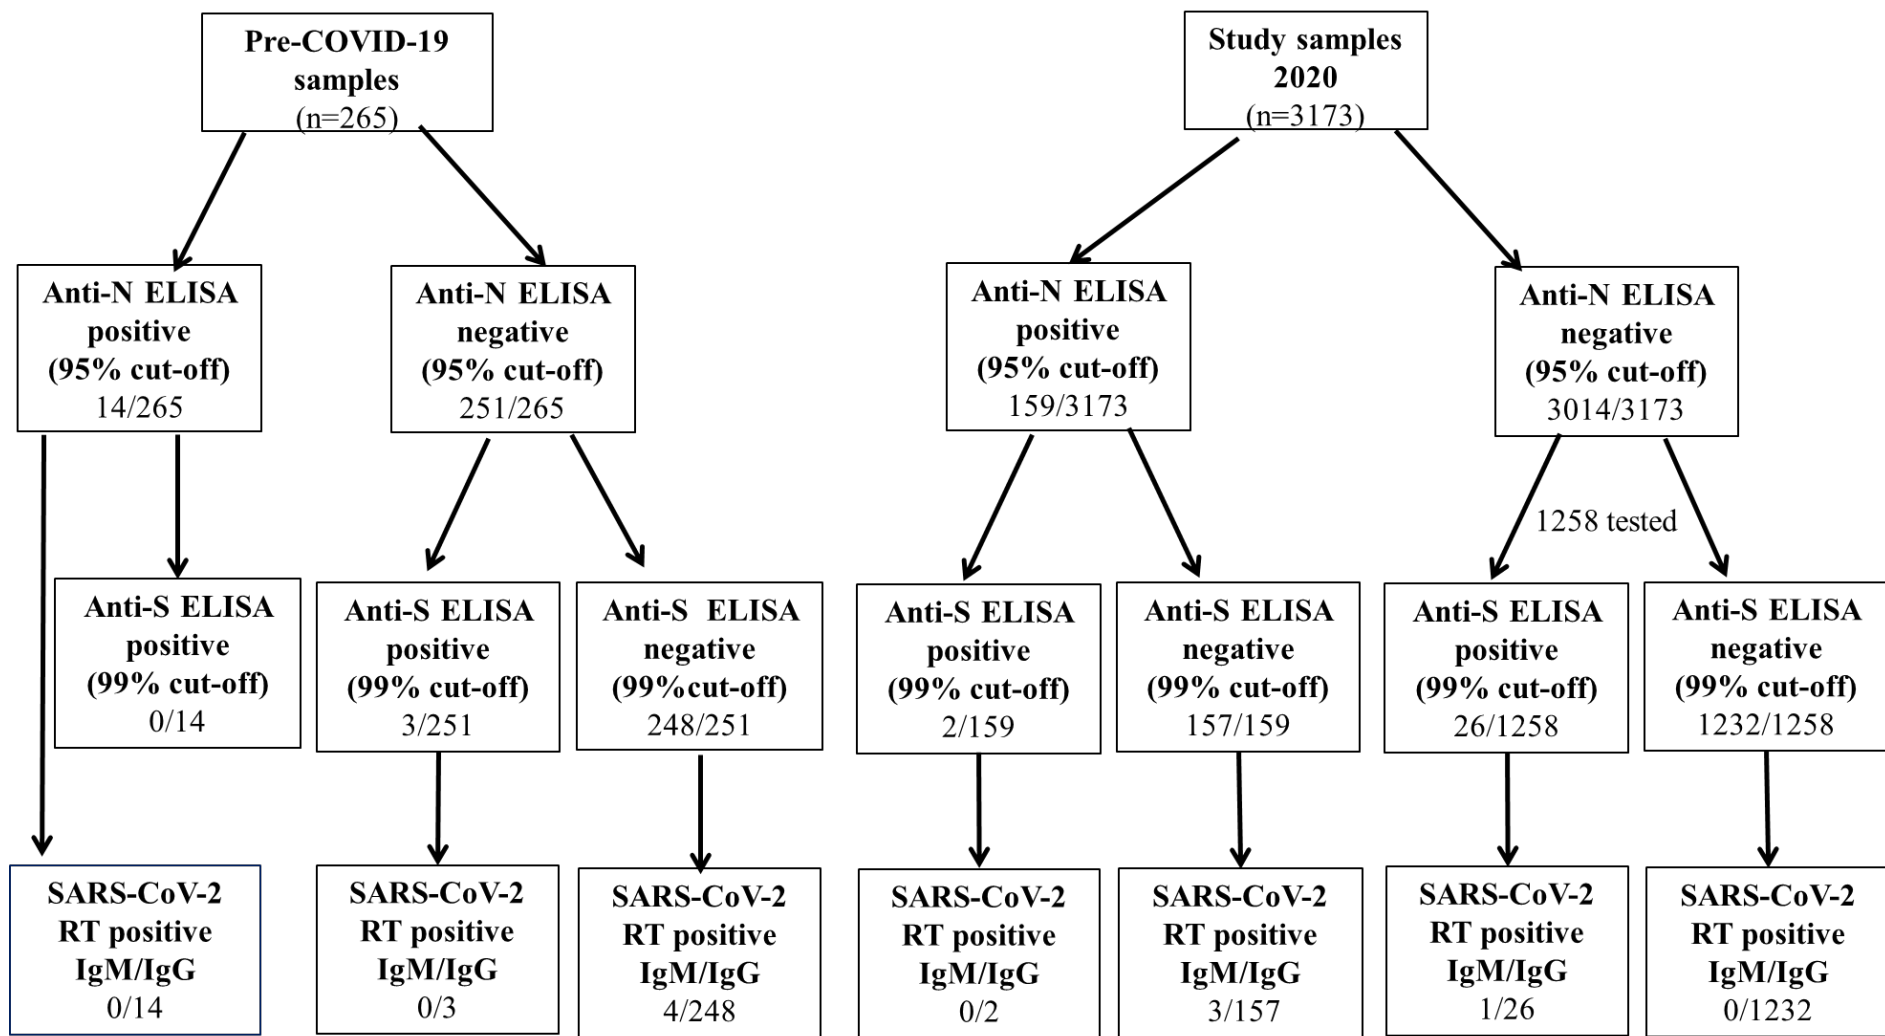

Supplementary Figure 1. Sample testing strategy.
